# Supplementary material
Source: publisher site journal article supplement (https://www.dovepress.com/article/244520)

Supplementary Figure 1. The plasma cfDNA concentrations and clinical correlates.

(A) The sizes of the cfDNA from polyp, adenoma, colon cancer, and rectal cancer patients. (B) The plasma cfDNA concentrations from patients with left-sided colon cancer, right-sided colon cancer, or rectal cancer. (C) There is no difference in the stage I, stage II, and stage III/IV of patients with colorectal carcinoma. (D) The plasma cfDNA concentrations of colon carcinoma were positively correlated with the tumor size in patients with colorectal carcinoma ( $r=0.569$ ,  $P<0.0001$ ). Data and error bars are presented as the mean $\pm$ SEM.

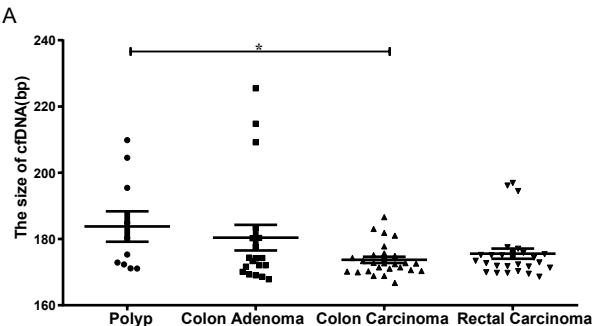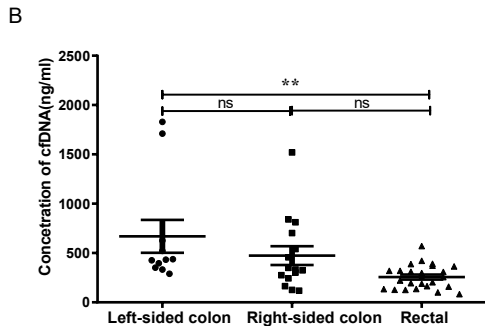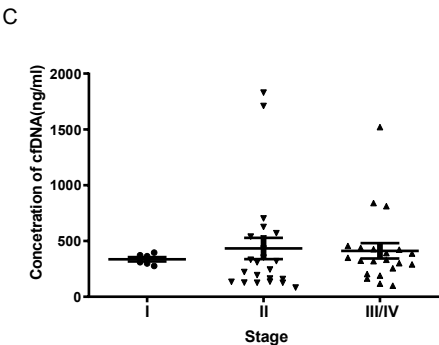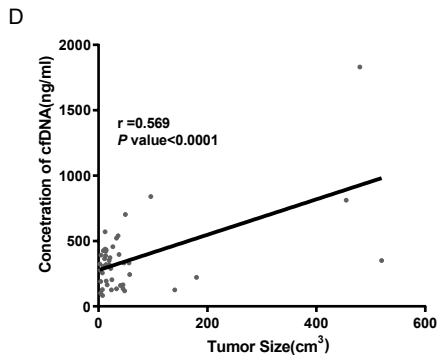

Supplement: Supplementary file 1 [file get_supplementary_file.php]
